# Supplementary material for: Realizing emission color tuning, ratiometric optical thermometry and temperature-induced redshift investigation in novel Eu3+-doped Ba3La(VO4)3 phosphors
Source: Royal Society of Chemistry journal article supplement (doi:10.1039/c9dt01917k), 2019-01-01
Supplement: c9dt01917k1.pdf [file c9dt01917k1.pdf]

## Supplementary Information

### Realizing Emission Color Tuning, Ratiometric Optical Thermometry and Temperature-induced Redshift Investigation in Novel $\text{Eu}^{3+}$ Doped $\text{Ba}_3\text{La}(\text{VO}_4)_3$ Phosphors

Peixin Yang<sup>1</sup>, Li Li<sup>1\*</sup>, Yongsen Deng<sup>1</sup>, Yongjie Wang<sup>1,2</sup>, Sha Jiang<sup>1</sup>, Xiaobing Luo<sup>1</sup>,  
Guotao Xiang<sup>1</sup>, Yi Lu<sup>3</sup>, Xianju Zhou<sup>1</sup>

1. College of Science, Chongqing University of Posts and Telecommunications,  
Chongqing 400065, P. R. China

2. Institute of Physics, Polish Academy of Sciences, Al. Lotników 32/46, Warsaw 02-  
668, Poland

3. College of Optoelectronic Engineering, Chongqing University of Posts and  
Telecommunications, Chongqing 400065, P. R. China

Corresponding author: [lilic@cqupt.edu.cn](mailto:lilic@cqupt.edu.cn) (L.Li)

Figure S1. The emission spectra ( $\lambda_{\text{ex}}=319$  nm) of  $\text{Ba}_3\text{La}_{1-x}(\text{VO}_4)_3: x\text{Sm}^{3+}$  phosphors

Figure S2. The temperature-dependent emission spectra of  $\text{Ba}_3\text{La}_{0.95}(\text{VO}_4)_3: 0.05\text{Sm}^{3+}$   
under 313 nm excitation.

Figure S3. The emission spectra ( $\lambda_{\text{ex}}=326$  nm) of  $\text{Ba}_3\text{La}_{1-x}(\text{VO}_4)_3: x\text{Dy}^{3+}$  phosphors

Figure S4. The temperature-dependent emission spectra of  $\text{Ba}_3\text{La}_{0.97}(\text{VO}_4)_3: 0.03\text{Dy}^{3+}$   
under 326 nm excitation.

---

\* Corresponding author. Li Li; E-mail: [lilic@cqupt.edu.cn](mailto:lilic@cqupt.edu.cn).

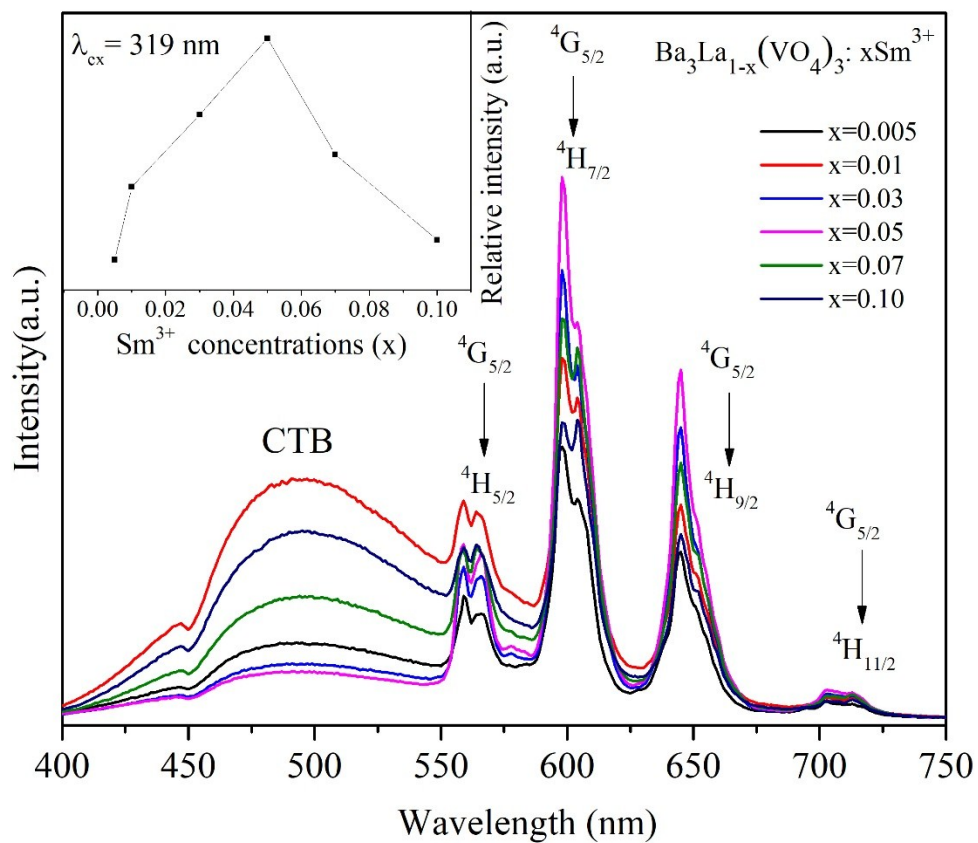

**Figure S1.** The emission spectra ( $\lambda_{\text{ex}}=319$  nm) of  $\text{Ba}_3\text{La}_{1-x}(\text{VO}_4)_3: x\text{Sm}^{3+}$  phosphors.

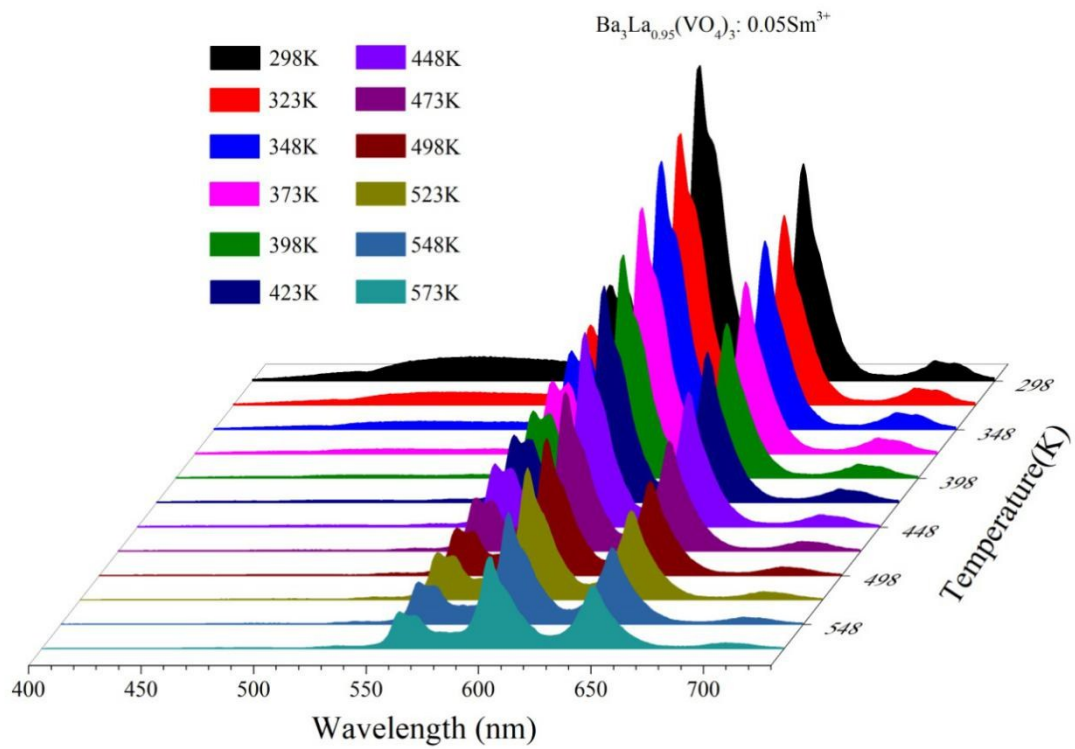

**Figure S2.** The temperature-dependent emission spectra of  $\text{Ba}_3\text{La}_{0.95}(\text{VO}_4)_3: 0.05\text{Sm}^{3+}$  under 313 nm excitation.

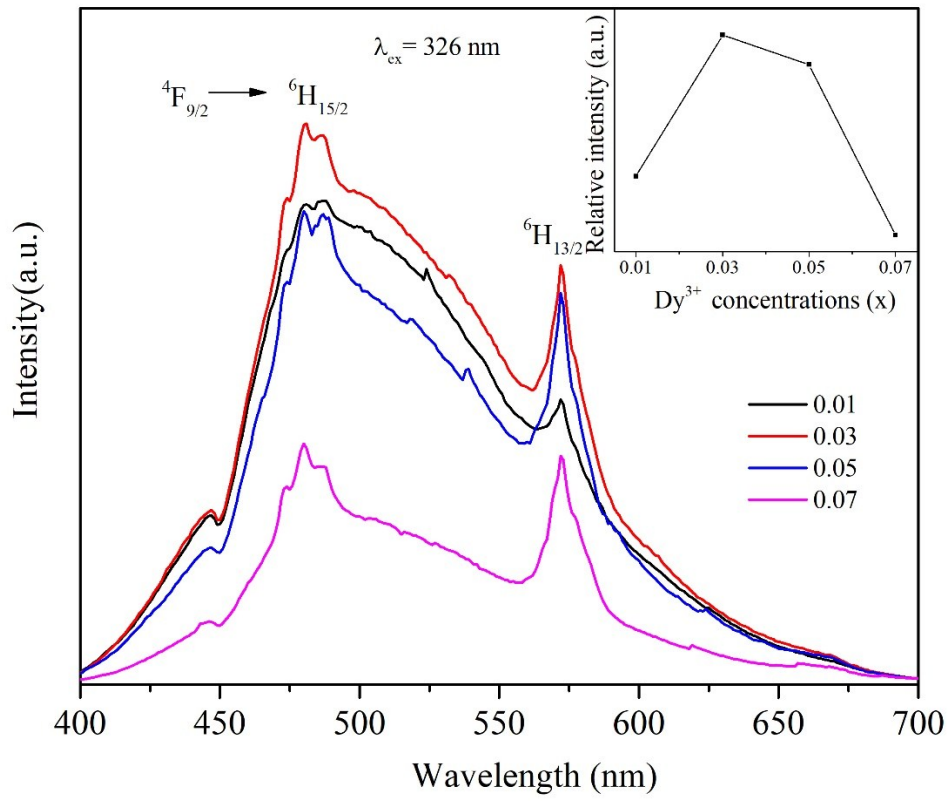

**Figure S3.** The emission spectra ( $\lambda_{\text{ex}}=326\text{nm}$ ) of  $\text{Ba}_3\text{La}_{1-x}(\text{VO}_4)_3: x\text{Dy}^{3+}$  phosphors.

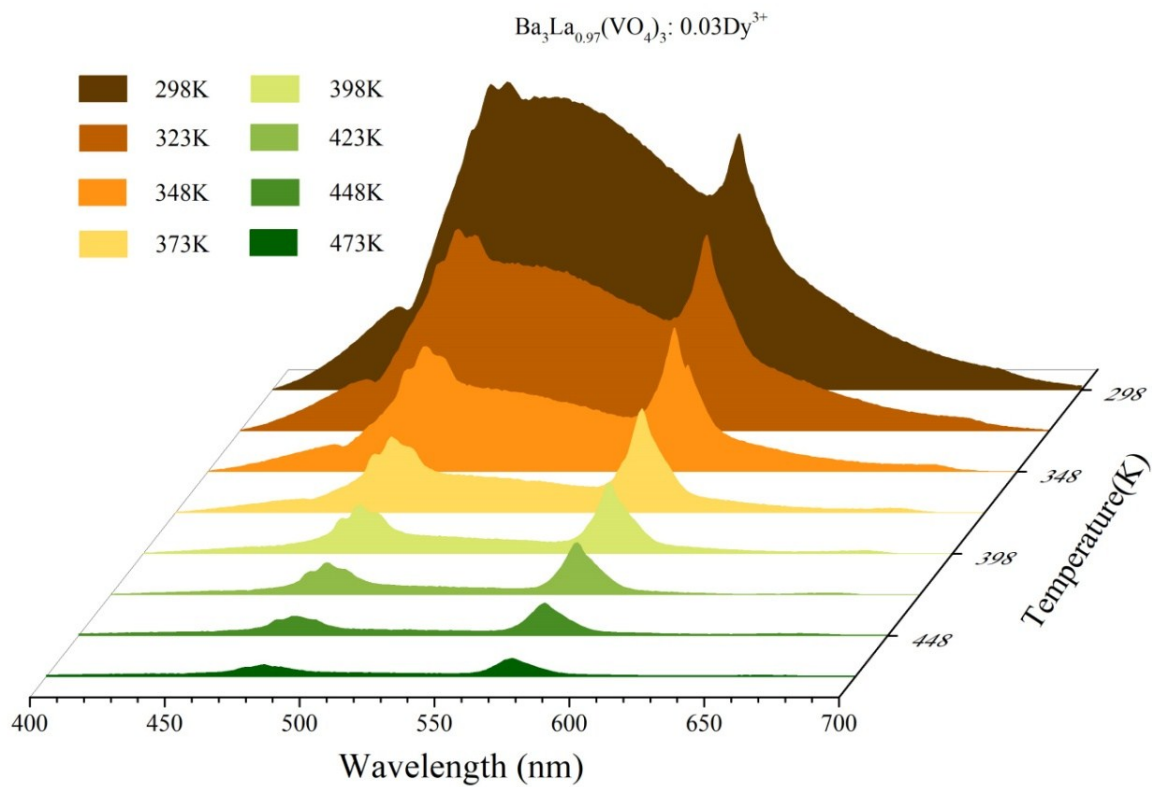

**Figure S4.** The temperature-dependent emission spectra of  $\text{Ba}_3\text{La}_{0.97}(\text{VO}_4)_3: 0.03\text{Dy}^{3+}$  under 326 nm excitation.
